# Supplementary material for: Multi-sulfonated functionalized hydrophilic covalent organic framework for highly efficient dye removal from real samples
Source: Royal Society of Chemistry journal article supplement (doi:10.1039/d2nj02857c), 2022-01-01
Supplement: d2nj02857c1.pdf [file d2nj02857c1.pdf]

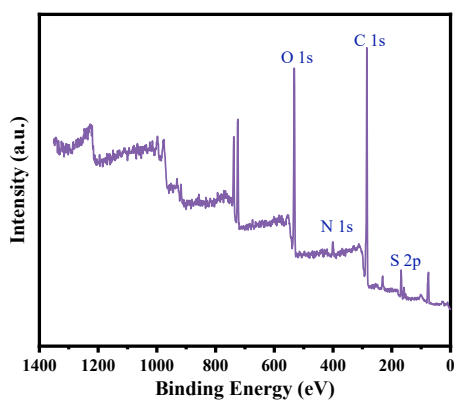

Fig. S1 The full scan XPS survey spectrum of **BTA-BDSA-COF**.

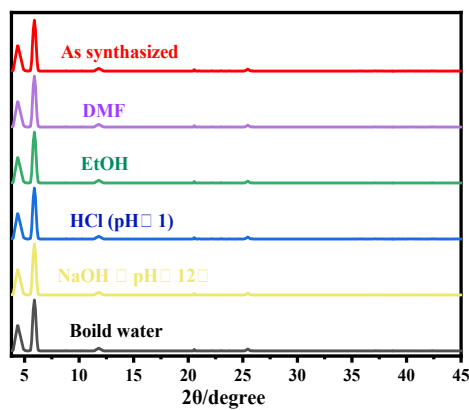

Fig. S2 PXRD patterns of **BTA-BDSA-COF** before and after treatment under the different conditions.

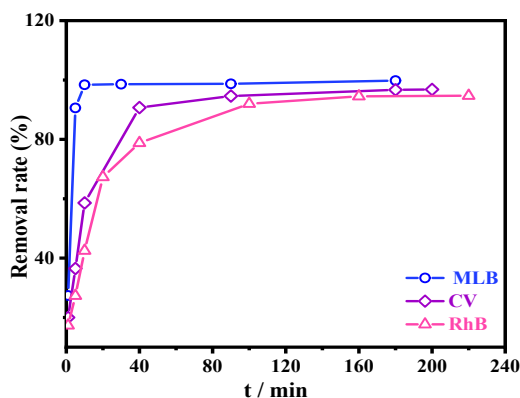

Fig. S3 **BTA-BDSA-COF** adsorption three Pseudo-second-order model.

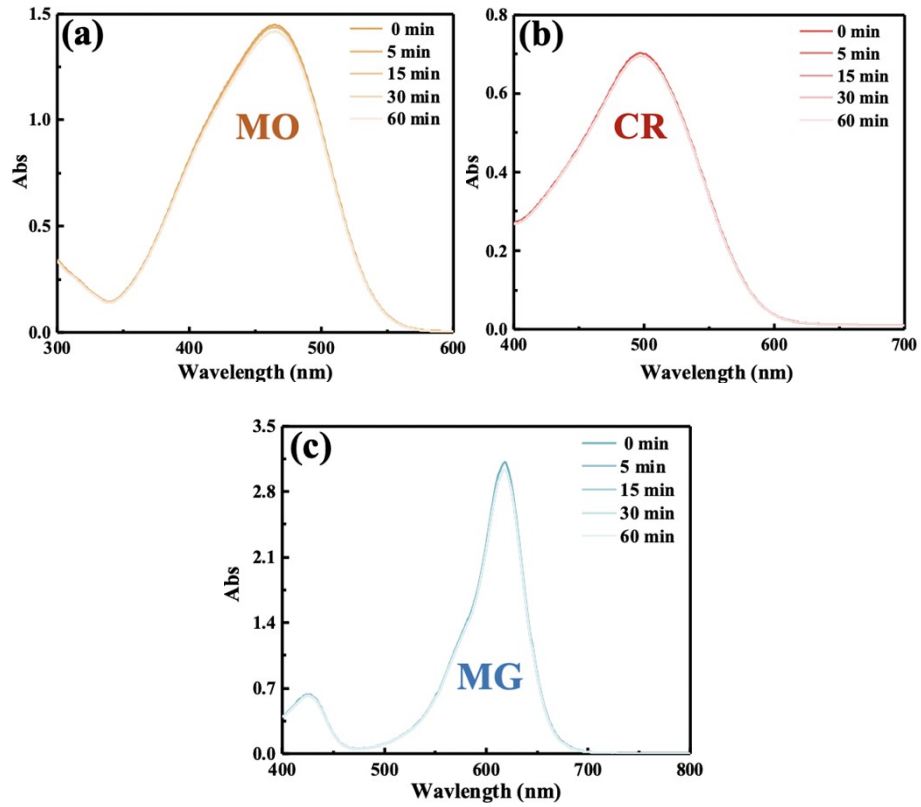

Fig. S4 UV-Vis absorption spectra of MO (a), CR (b) and MG (c) solutions with increasing adsorption time.

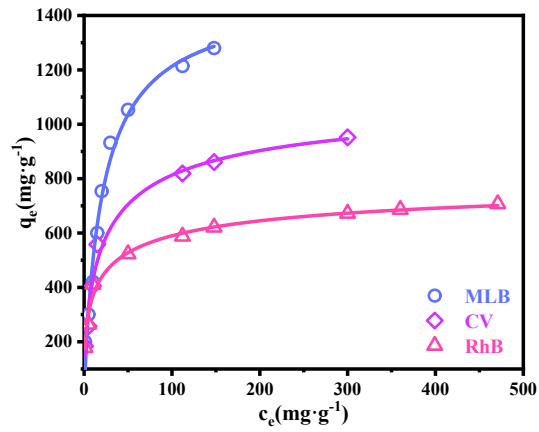

Fig. S5 Adsorption isotherms of BTA-BDSA-COF for MLB, CV and RhB.

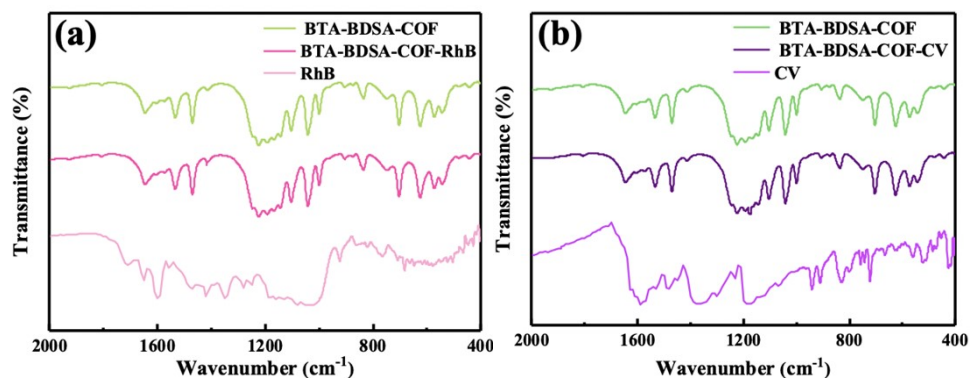

Fig. S6 FT-IR spectra of cationic dyes, **BTA-BDSA-COF** before and after adsorption of RhB(a) and CV (b).

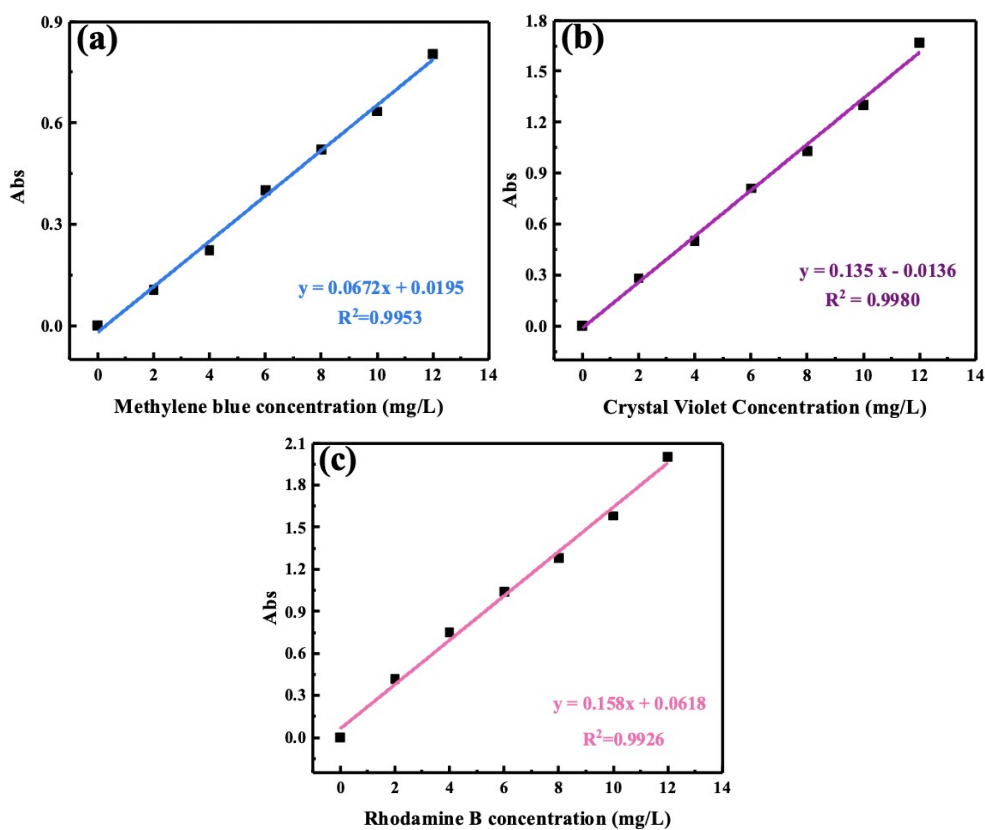

Fig. S7 Standard curves for MLB (a), CV (b), and RhB (c) dyes in water.
